# Supplementary material for: Ternary NiFeZr layered double hydroxides: a highly efficient catalyst for the oxygen evolution reaction
Source: Royal Society of Chemistry journal article supplement (doi:10.1039/c9cc06219j), 2019-01-01
Supplement: c9cc06219j1.pdf [file c9cc06219j1.pdf]

## Supplementary Information

### **Ternary NiFeZr layered double hydroxides nanosheets: an highly efficient catalyst for oxygen evolution reaction**

#### **1. Experimental Section**

##### **Chemicals:**

Nickel (II) nitrate hexahydrate ( $\text{Ni}(\text{NO}_3)_2 \cdot 6\text{H}_2\text{O}$ , 98%, Kermel), iron (III) nitrate nonahydrate ( $\text{Fe}(\text{NO}_3)_3 \cdot 9\text{H}_2\text{O}$ , Aladdin), zirconium (IV) oxychloride octahydrate ( $\text{ZrOCl}_2 \cdot 8\text{H}_2\text{O}$ , 99%, Kermel), urea ( $\text{CO}(\text{NH}_2)_2$ , 99%, AR, Kermel), Potassium hydroxide (KOH, 98%, Kermel), hydrochloric acid (HCl, 36-38 wt%, Xilong Scientific), iridium oxide powder ( $\text{IrO}_2$ , 99%, Aladdin), Nickel foam, deionized water. Deionized water was used for the preparation of all aqueous solutions. All reagents used in the experiments were of analytical grade, and no further processing was required.

##### **Pretreatment of Ni foam:**

In a reformatory procedure, the nickel foam (about  $3 \times 4 \text{ cm}^2$ ) was first cleaned with 40 ml of deionized water and 10 ml of 1M HCl solution by ultrasonic treatment for 10 min. The nickel oxide layer on the surface of the nickel foam was removed by reaction with  $\text{H}^+$  in the solution. Subsequently, the nickel foam was sonicated for 10 minutes in deionized water and ethanol respectively to ensure that the nickel foam was clean, and then drying naturally at  $60^\circ\text{C}$ .

##### **Fabrication of NiFeZr LDHs:**

$\text{Ni}(\text{NO}_3)_2 \cdot 6\text{H}_2\text{O}$  (1.8 mmol),  $\text{ZrOCl}_2 \cdot 8\text{H}_2\text{O}$  (0.45 mmol),  $\text{Fe}(\text{NO}_3)_3 \cdot 9\text{H}_2\text{O}$  (0.45 mmol), and urea (4.5 mmol) were dissolved in 60 mL of deionized water, sonicated for about 15 min to form a clear and transparent solution. Put the above solution together with clean foam nickel into a 100 ml Teflon-lined stainless-steel autoclave, and then keep the reaction at  $120^\circ\text{C}$  for 12 h. After the reaction, the NiFeZr LDHs were naturally cooled to room temperature, and the final products were ultrasonic for 5 min in a of ethanol-deionized water mixture with a volume ratio of 1:1, then rinsed several repeats with deionized water and ethanol respectively respectively, and subsequently dried at  $60^\circ\text{C}$  for 10 h. The weight of catalyst is about  $4 \text{ mg cm}^{-2}$  on the

surface of the nickel foam. In addition, NiFeZr LDHs with different initial metal salt ratios were prepared, in which the molar ratios of Ni (NO<sub>3</sub>)<sub>2</sub>·6H<sub>2</sub>O, Fe (NO<sub>3</sub>)<sub>3</sub>·9H<sub>2</sub>O and ZrOCl<sub>2</sub>·8H<sub>2</sub>O were 4:0.5:1.5, 4:1.5:0.5, 3:1:1, 5:1:1, 6:1:1, respectively.

**Fabrication of NiFe LDHs, NiZr LDHs and Ni (OH)<sub>2</sub>:**

NiFe LDHs and NiZr LDHs nanosheets were prepared by the above method. The difference was that the initial metal salts of NiFe LDHs were Ni (NO<sub>3</sub>)<sub>2</sub>·6H<sub>2</sub>O (1.8 mmol) and Fe (NO<sub>3</sub>)<sub>3</sub>·9H<sub>2</sub>O (0.9 mmol), while the initial metal salts of NiZr LDHs were Ni (NO<sub>3</sub>)<sub>2</sub>·6H<sub>2</sub>O (1.8 mmol) and ZrOCl<sub>2</sub>·8H<sub>2</sub>O (0.9 mmol). The Ni (OH)<sub>2</sub> nanoarrays was synthesized by the above method only with Ni (NO<sub>3</sub>)<sub>2</sub>·6H<sub>2</sub>O (2.7 mmol) and urea (4.5 mmol).

**Fabrication of IrO<sub>2</sub>/C electrode on Ni foam:**

To acquire the 40wt% IrO<sub>2</sub>/C electrode, 4 mg IrO<sub>2</sub> powder, 6 mg carbon black (Vulcan XC-72R), and 60 μL nafion were mixed with 1 mL N, N-dimethyl formamide by ultrasonication for about 15 min. Next, 40% of the obtained homogeneous ink was coated onto a bare Ni foam substrate with a geometric area of 1 cm<sup>2</sup>, which appointed as IrO<sub>2</sub>/C for comparison.

**Electrochemical Measurements:**

The electrochemical measurements were carried out at room temperature in a three-electrode glass cell connected to an electrochemical workstation (CHI 760A, CH, Shanghai.). The potentials vs Hg/HgO recorded in alkaline media were displayed versus RHE by the following Nernst equation without otherwise noted:

$$E(\text{RHE}) = E(\text{Hg}/\text{HgO}) + 0.098 + 0.059 \times \text{pH} \quad (\text{eq 1})$$

Then, the gained potentials were corrected for iR drop by another equation:

$$E(\text{iR}) = E(\text{RHE}) - \text{iR} \quad (\text{eq 2})$$

where E(iR) denotes the actual applied bias vs. RHE and iR represents the voltage drop caused by the solution. And, the overpotential (η) is the potential difference between E(RHE) and the theoretical minimum potential (1.23 V) required for electrolyzed water. The current density (J) indicated was calculated according to the geometric area of the electrode. Meanwhile, Tafel slopes were obtained based on the Tafel Equation:

$$E(\text{iR}) = b \cdot \log( / J / ) + a \quad (\text{eq 3})$$

where b and J respectively denote the Tafel slope and the current density. The double-layer capacitor (C<sub>dl</sub>) is measured by CV at a scan rate of 10, 20, 30, 40, 50 mV s<sup>-1</sup> without Faraday current, and current density average differences(ΔJ) is obtained

through dividing the CV integral area by the potential difference (0.1 V). The ECSA is the ratio of the Cdl of the electrode to the specific capacitance ( $C_s$ ) of the ideal smooth electrode with a geometric area of  $1 \text{ cm}^2$ , see the equation 4:

$$\text{ECSA} = A * C_{dl} / C_s \quad (\text{eq 4})$$

where A is the geometric area, and the value of  $C_s$  ranges from 20-60  $\text{mF cm}^{-2}$ , where  $C_s = 40 \text{ mF cm}^{-2}$  is used to calculate the ECSA of samples.<sup>1</sup> And normalized current densities ( $J_{\text{ECSA}}$ ) were acquired through dividing by the ECSAs.

### Characterizations of materials:

The crystalline structure of the sample was analyzed by X-ray diffraction (XRD, D/MAX-2500) with a Cu-K  $\alpha$  radiation source. Scanning electron microscope (SEM, S-4800) was applied to investigate the morphology and corresponding energy dispersion X-ray mapping of the samples. And transmission electron microscope (TEM, Talos F200X) was used for the microstructure analysis of the samples. The chemical states of element were determined by X-ray photoelectron spectroscopy (XPS) using a Per-kin-Elmer PHI5300ESCALAB 250Xi with Al K $\alpha$  as the X ray source.

## 2. Figures

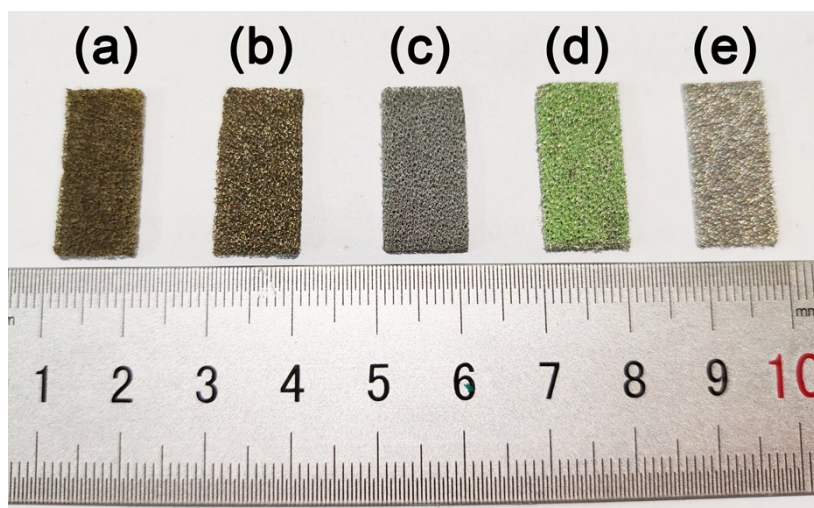

**Fig. S1** Optical images of (a) NiFeZr LDHs nanosheets, (b) NiFe LDHs nanosheets, (c) NiZr LDHs nanosheets, (d) Ni (OH)<sub>2</sub> on Ni foam, (e) pure nickel foam. The color of as-prepared NiFeZr LDHs nanosheets is different from those of samples.

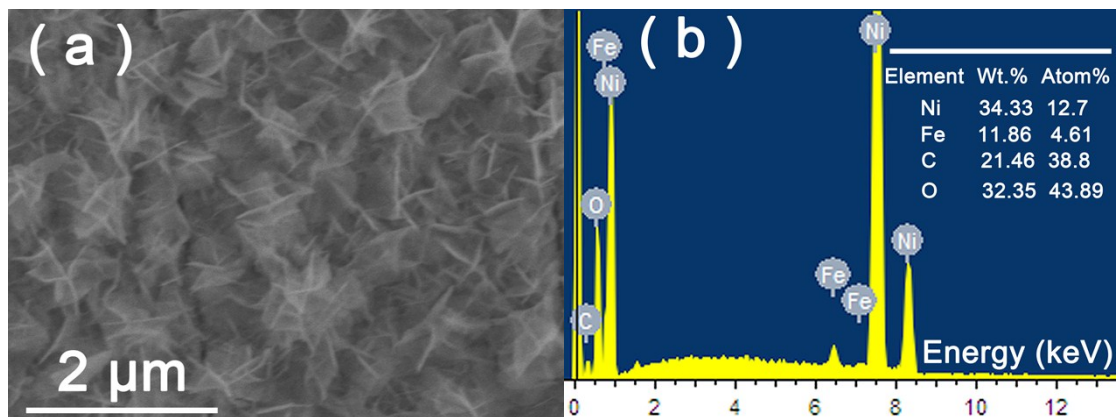

**Fig. S2** (a) SEM image of NiFe LDHs nanosheets. (b) EDS spectra and corresponding elements ratio of NiFe LDHs nanosheets.

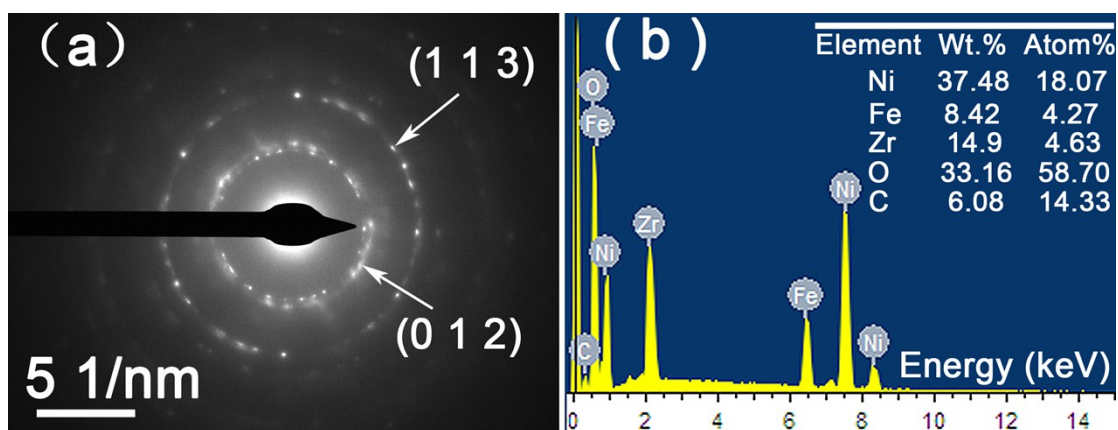

**Fig. S3** (a) SAED patterns of NiFeZr LDHs, demonstrating the crystal structure of NiFeZr LDHs nanosheets. (b) EDS spectra and corresponding element ratio of NiFeZr LDHs.

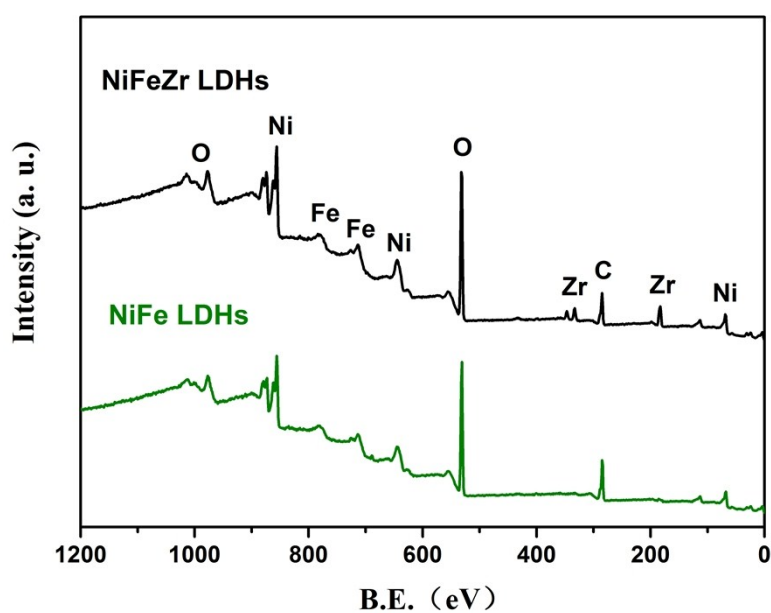

**Fig. S4** The XPS profile survey spectra for both NiFeZr LDHs and NiFe LDHs.

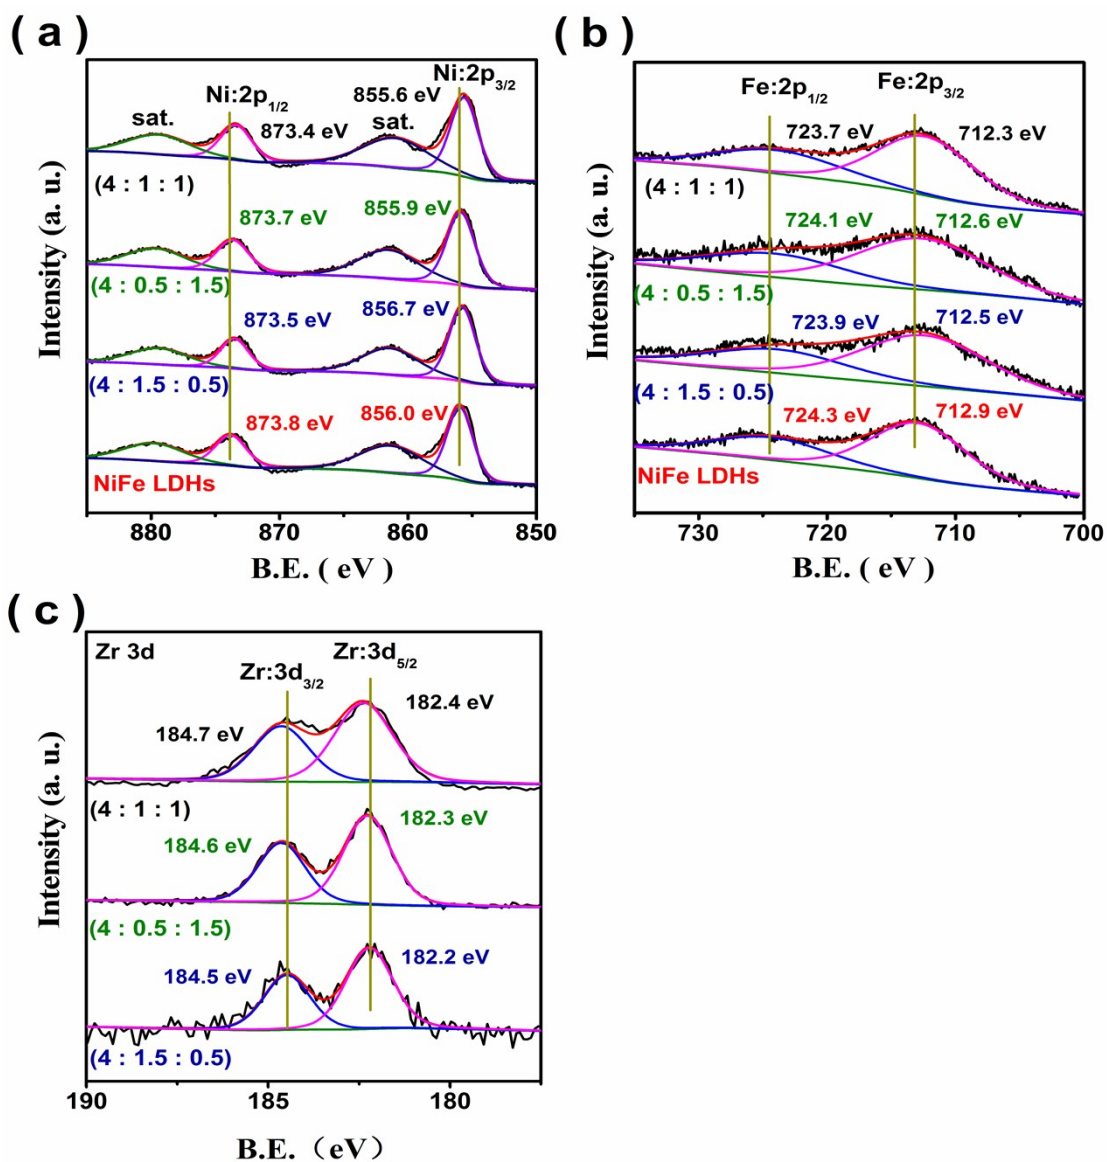

**Fig. S5** High resolution XPS spectra of (a) Ni 2p, (b) Fe 2p, (c) Zr 3d for NiFeZr LDHs (d) Zr 3d for the NiFeZr LDHs with different starting material feed ratios of metal salts. The (4:1:1), (4:0.5:1.5), and (4:1.5:0.5) were respectively NiFeZr LDHs (4:1:1), NiFeZr LDHs (4:0.5:1.5), and NiFeZr LDHs (4:1.5:0.5). Obviously, when the Fe:Zr ratio was 1:1, the characteristic peaks of Ni 2p and Fe 2p were shifted to lower binding energy, and the characteristic peaks of Zr 3d were shifted to higher binding energy, compared with other Fe:Zr ratios. It demonstrated that there were stronger electronic interactions between Zr<sup>4+</sup>, Ni<sup>2+</sup> and Fe<sup>3+</sup> for NiFeZr LDHs with Fe:Zr (1:1).

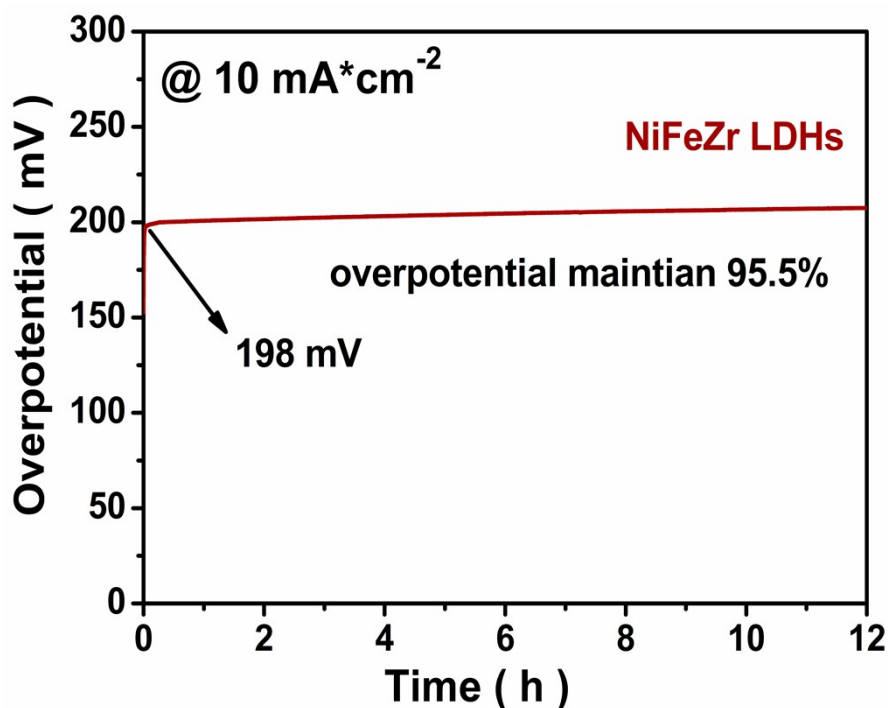

**Fig. S6** Potential testing at constant current densities of  $10 \text{ mA cm}^{-2}$  on the NiFeZr LDHs electrode. The accurate overpotential of NiFeZr LDHs was 198mV to achieve  $10 \text{ mA cm}^{-2}$  according to the galvanostatic measurement without the effect of the nickel anode signal.

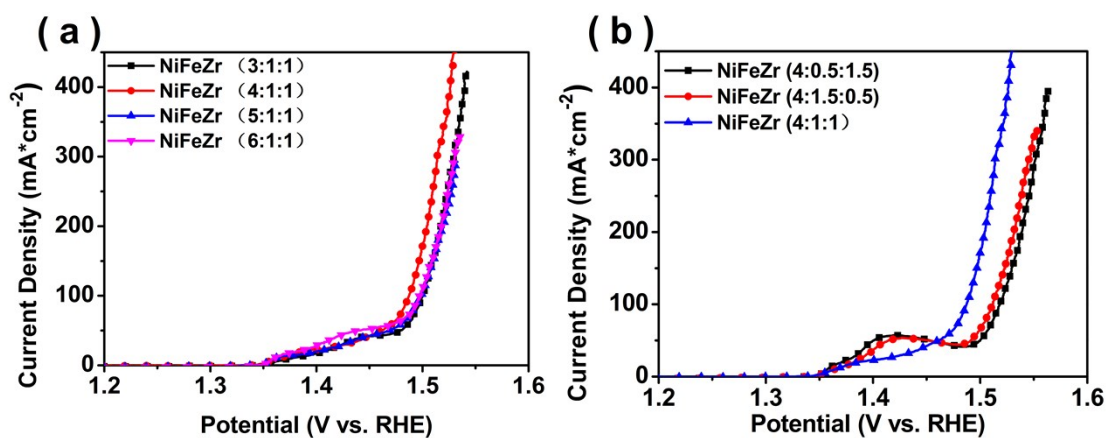

**Fig. S7** Polarization curves of the NiFeZr LDHs catalysts with different starting material feed ratio of metal salts.

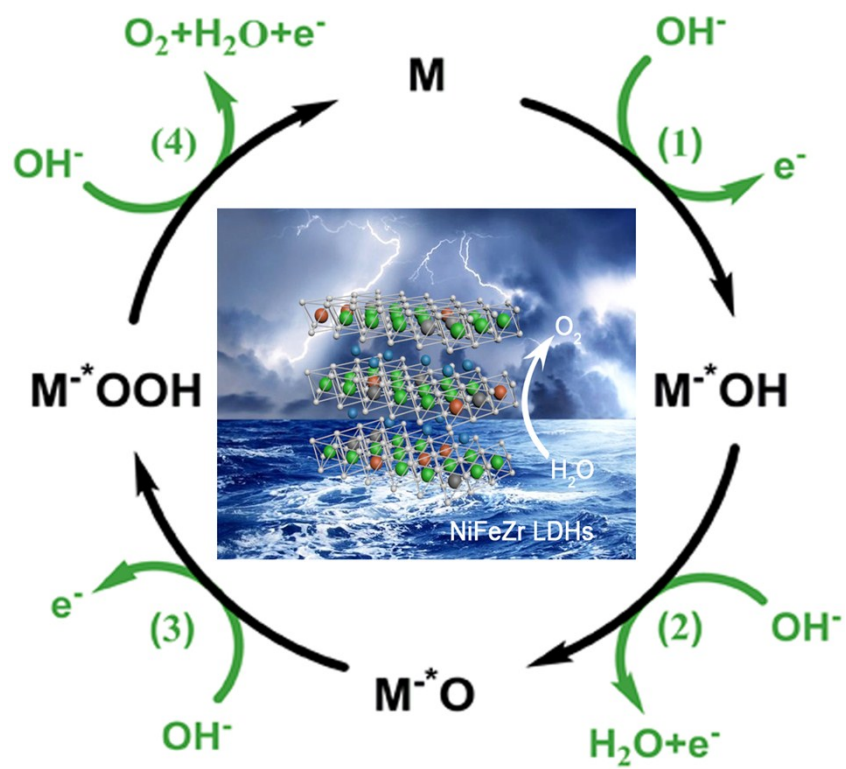

**Fig. S8** The OER reaction mechanism in alkaline conditions.

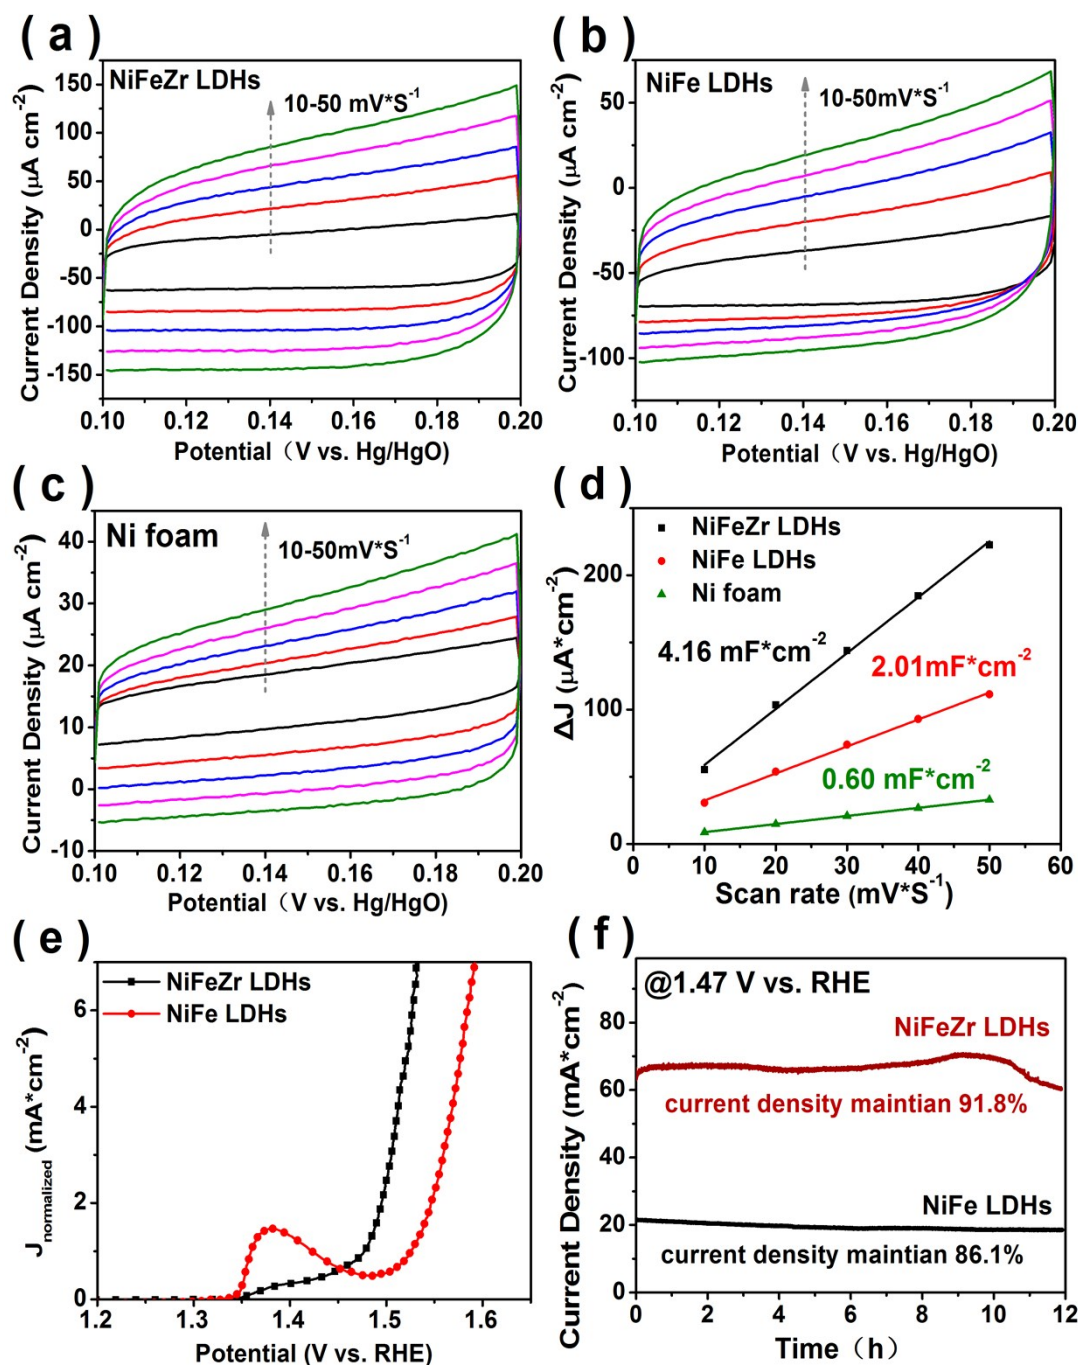

**Fig. S9** Electrochemical measurements of the double-layer capacitance of (a) NiFeZr LDHs, (b) NiFe LDHs, (c) Ni foam electrodes at the non-Faradic region (0.1-0.2 V vs. Hg/HgO) with various scan rates (10 mV/s-50mV/s). (d) The normalized LSV curves of NiFeZr LDHs and NiFe LDHs. (e) The Cdl calculations of NiFeZr LDHs, NiFe LDHs, and Ni foam. (f) The potentiostatic stability test of NiFeZr LDHs and NiFe LDHs.



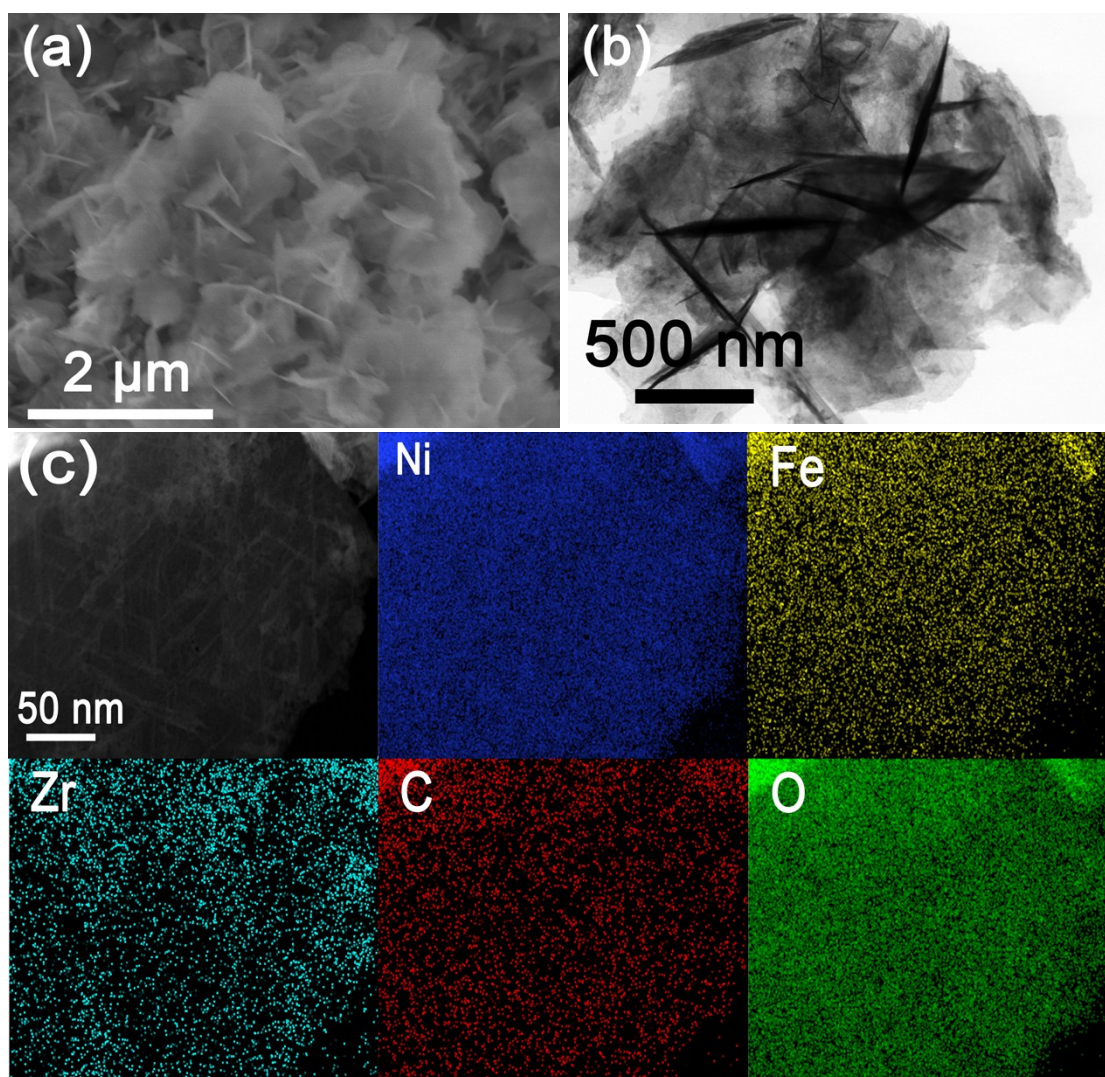

**Fig. S10** (a) SEM image, (b) TEM image, (c) HAADF-STEM and elemental mapping images of NiFeZr LDHs nanosheets after the potentiostatic stability test for 12 h.

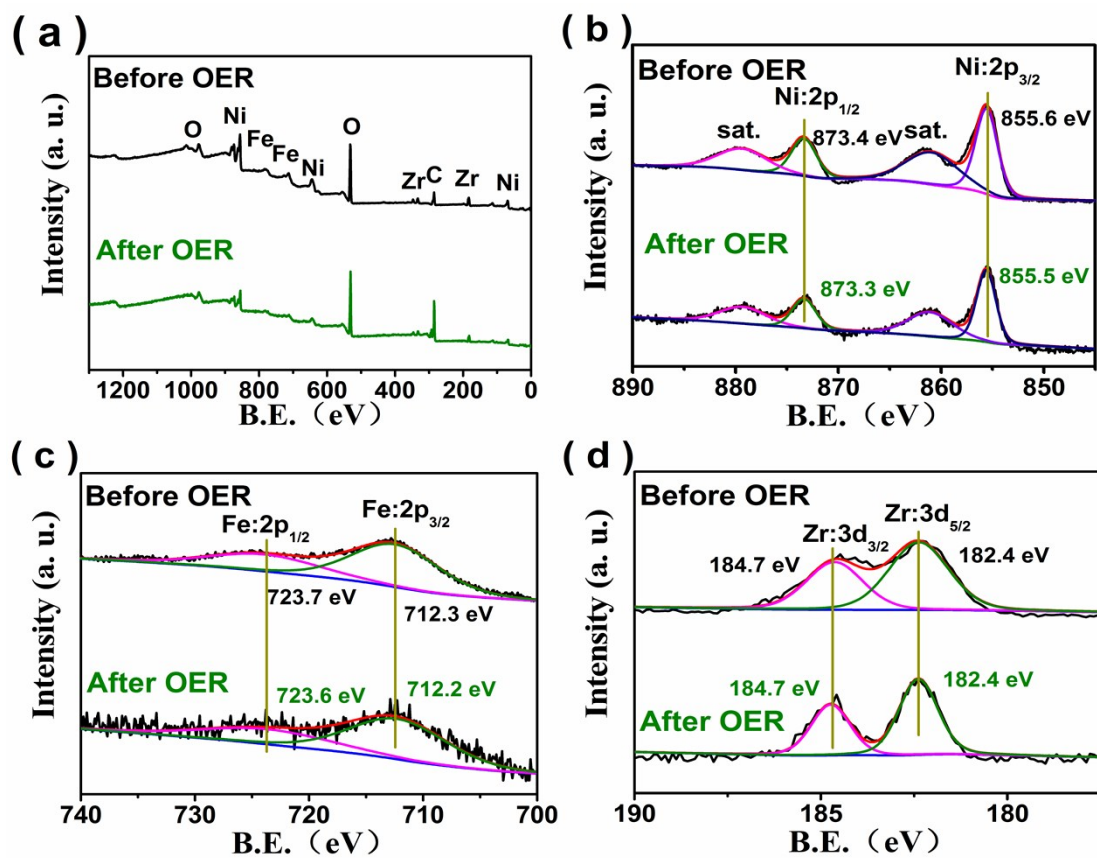

**Fig. S11** (a) The XPS profile survey spectra, and High resolution XPS spectrums of (a) Ni 2p, (b) Fe 2p, (c) Zr 3d for NiFeZr LDHs for the NiFeZr LDHs before and after the potentiostatic stability test at 1.47 V vs. RHE for 12 h in 1M KOH.

### 3. Table

**Table S1** The percentages of metal atoms on the surface of the catalysts obtained from XPS.

| Catalyst<br>Atomic % | NiFeZr LDHs<br>(4:1:1) | NiFe LDHs | NiFeZr LDHs<br>(4:0.5:1.5) | NiFeZr LDHs<br>(4:1.5:0.5) |
|----------------------|------------------------|-----------|----------------------------|----------------------------|
| Ni                   | 14.99                  | 12.7      | 15.11                      | 18.05                      |
| Fe                   | 5.55                   | 4.61      | 4.03                       | 6.22                       |
| Zr                   | 2.29                   | -         | 3.31                       | 0.69                       |
| C                    | 28.71                  | 38.8      | 34.66                      | 29.69                      |
| O                    | 48.45                  | 43.89     | 42.9                       | 45.35                      |

The surface metal ratio was about 4: 1.5: 0.6 (Ni:Fe:Zr) for NiFeZr LDHs (4:1:1) from the XPS data, different from the EDS result ( $\approx$  4: 1: 1) (Fig. S3b). It indicated the presence of potential surface element separation, which could be related to the electronic interactions between Ni, Fe, and Zr elements.

**Table S2** Comparison of OER activities of different NiFe based systems.

| Catalyst                                                                     | Support | Electrolyte | Overpotential<br>(mV)       | Tafel slope<br>(mV/dec) | Reference |
|------------------------------------------------------------------------------|---------|-------------|-----------------------------|-------------------------|-----------|
| NiFeZr LDHs                                                                  | NF      | 1.0 M KOH   | 198 (10mA/cm <sup>2</sup> ) | 53.1                    | This work |
| <sup>18</sup> Au/NiFe LDH                                                    | TM      | 1.0 M KOH   | 237 (10mA/cm <sup>2</sup> ) | 36                      | 1         |
| NiFeV LDHs                                                                   | NF      | 1.0 M KOH   | 195 (20mA/cm <sup>2</sup> ) | 42                      | 2         |
| NiFeCr LDH                                                                   | CP      | 1.0 M KOH   | 280 (10mA/cm <sup>2</sup> ) | 129                     | 3         |
| Fe-doped $\beta$ -Ni(OH) <sub>2</sub>                                        | NF      | 1.0 M KOH   | 219 (10mA/cm <sup>2</sup> ) | 53                      | 4         |
| Ce-Doped NiFe LDH                                                            | CNT     | 1.0 M KOH   | 227 (10mA/cm <sup>2</sup> ) | 33                      | 5         |
| S-NiCoFe LDH                                                                 | CC      | 1.0 M KOH   | 206 (10mA/cm <sup>2</sup> ) | 46                      | 6         |
| flame-engraved NiFe-LDH                                                      | NF      | 0.1 M KOH   | 250 (10mA/cm <sup>2</sup> ) | 69                      | 7         |
| Cu@NiFe LDH                                                                  | CF      | 1.0 M KOH   | 199(10mA/cm <sup>2</sup> )  | 27.8                    | 8         |
| (Ni <sub>2</sub> Co <sub>1</sub> ) <sub>0.925</sub> Fe <sub>0.075</sub> -MOF | GC      | 1.0 M KOH   | 257 (10mA/cm <sup>2</sup> ) | 41.3                    | 9         |
| NiFe/Co <sub>9</sub> S <sub>8</sub> /CC                                      | CC      | 1.0 M KOH   | 219 (10mA/cm <sup>2</sup> ) | 55                      | 10        |

TM: Ti mesh, NF: Ni foam, GC: glassy carbon, CP: carbon paper, CNT: carbon nanotube, CC: carbon cloth, CF: Cu foam.

## Reference

1. J. Zhang, J. Liu, L. Xi, Y. Yu, N. Chen, S. Sun, W. Wang, K. M. Lange and B. Zhang, *J Am. Chem. Soc.*, 2018, **140**, 3876-3879.
2. P. Li, X. Duan, Y. Kuang, Y. Li, G. Zhang, W. Liu and X. Sun, *Adv. Energy Mater.*, 2018, **8**, 1703341.
3. Y. Yang, L. Dang, M. J. Shearer, H. Sheng, W. Li, J. Chen, P. Xiao, Y. Zhang, R. J. Hamers and S. Jin, *Adv. Energy Mater.*, 2018, **8**, 1703189.
4. T. Kou, S. Wang, J. L. Hauser, M. Chen, S. R. J. Oliver, Y. Ye, J. Guo and Y. Li, *ACS Energy Lett.*, 2019, **4**, 622-628.
5. H. Xu, B. Wang, C. Shan, P. Xi, W. Liu and Y. Tang, *ACS Appl. Mater. Interfaces*, 2018, **10**, 6336-6345.
6. L.-M. Cao, J.-W. Wang, D.-C. Zhong and T.-B. Lu, *J. Mater. Chem. A*, 2018, **6**, 3224-3230.
7. D. Zhou, X. Xiong, Z. Cai, N. Han, Y. Jia, Q. Xie, X. Duan, T. Xie, X. Zheng, X. Sun and X. Duan, *Small Methods*, 2018, **2**, 1800083.
8. L. Yu, H. Zhou, J. Sun, F. Qin, F. Yu, J. Bao, Y. Yu, S. Chen and Z. Ren, *Energy Environ. Sci.*, 2017, **10**, 1820-1827.
9. Q. Qian, Y. Li, Y. Liu, L. Yu and G. Zhang, *Adv. Mater.*, 2019, **31**, e1901139.
10. C. Zhan, Z. Liu, Y. Zhou, M. Guo, X. Zhang, J. Tu, L. Ding and Y. Cao, *Nanoscale*, 2019, **11**, 3378-3385.
